# Supplementary material
Source: ML conference proceedings conference paper supplement (https://openreview.net/forum?id=pu3sNlrgQr)
Supplement: supplementary_material [file attachment]

---

# Supplementary Material for Intrinsic Object-Centric Image Similarity

---

Klemen Kotar\*, Stephen Tian\*, Hong-Xing Yu, Daniel L. K. Yamins, Jiajun Wu  
Stanford University

\*Equal contribution

{klemenk, stephentian, koven, yamins, jiajunw}@stanford.edu

## 1 A Dataset Details

2 Our dataset consists of a total of 50 categories with 2 or 10 instances each, for a total of 180 objects.  
3 The specific categories are listed below:

|                             |                             |                      |
|-----------------------------|-----------------------------|----------------------|
| 4 1. Apple                  | 21 18. Bell pepper (orange) | 38 35. Bowl          |
| 5 2. Strawberry             | 22 19. Bell pepper (red)    | 39 36. Notebook      |
| 6 3. Orange                 | 23 20. Can of tomatoes      | 40 37. Book          |
| 7 4. Pear                   | 24 21. Eggplant             | 41 38. Diet Coke     |
| 8 5. Apricot                | 25 22. Green water bottle   | 42 39. Red soda      |
| 9 6. Banana                 | 26 23. Marker               | 43 40. Rose          |
| 10 7. Mango                 | 27 24. Pencil (blue)        | 44 41. Cookie        |
| 11 8. Broccoli              | 28 25. Pen                  | 45 42. Octopus       |
| 12 9. Carrot                | 29 26. Mug                  | 46 43. Cardboard box |
| 13 10. Potato               | 30 27. Ceramic Mug          | 47 44. Mouse         |
| 14 11. Yellow onion         | 31 28. Fork                 | 48 45. Keyboard      |
| 15 12. Shallot              | 32 29. Spoon                | 49 46. Cable         |
| 16 13. Tomato               | 33 30. Butter Knife         | 50 47. Screwdriver   |
| 17 14. Grapes               | 34 31. Spatula (wood)       | 51 48. Pliers        |
| 18 15. Lettuce              | 35 32. Cups                 | 52 49. Hammer        |
| 19 16. Avocado              | 36 33. Ceramic pot          | 53 50. Screw         |
| 20 17. Bell pepper (yellow) | 37 34. Plate                |                      |

54 Additionally, ten categories contain ten object instances. These categories are enumerated below:

|                   |             |                    |
|-------------------|-------------|--------------------|
| 55 1. Apple       | 59 5. Fork  | 63 9. Screw        |
| 56 2. Banana      | 60 6. Spoon | 64 10. Screwdriver |
| 57 3. Pen         | 61 7. Book  |                    |
| 58 4. Ceramic Mug | 62 8. Mouse |                    |

| Light setting     | Shutter speed | F-number | ISO  | Focal length |
|-------------------|---------------|----------|------|--------------|
| Left, back, right | 1/640s        | f/2.8    | 2000 | 39mm         |
| Low light         | 1/20s         | f/2.8    | 2000 | 39mm         |

Table 1: Camera settings for our dataset.

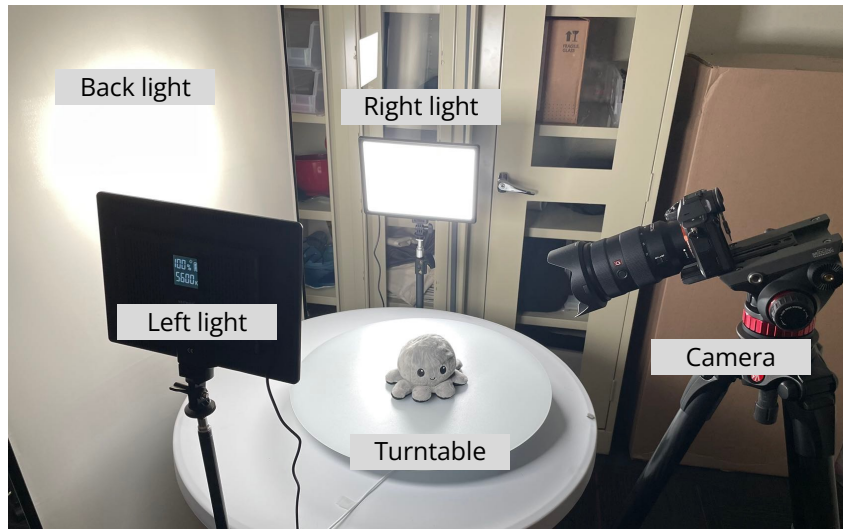

Figure A1: Capture setting for our controlled **different illumination** and **different object poses** configurations.

65 We capture images using a Sony  $\alpha$  7IV mirrorless camera equipped with a FE 24-70mm F2.8 GM  
66 lens. The camera settings used in our **different illumination** and **different object poses** data capture  
67 configurations are enumerated in Table 1. We show our capture setup in Figure A1.

68 For the **different object poses** data capture configuration, we use the turntable to perform a full 360  
69 degree rotation at a constant velocity with a period of approximately 24 seconds. We then configure  
70 the camera to capture 24 images shooting at an interval of 1 second.

71 We capture images in the controlled setting at a resolution of  $3168 \times 3168$ .

72 For “in-the-wild” settings, we capture images using cell phones (iPhone 13, iPhone 14 Pro, iPhone  
73 12 Mini) at varying resolutions.

## 74 B Data

75 **Dataset description.** We provide a dataset description in a dataset sheet: <https://github.com/s-tian/PlatonicDistance/blob/main/datasheet.md>  
76

77 **Link and license.** The dataset is uploaded for public download under the CC-BY-4.0 license:  
78 <https://purl.stanford.edu/gj714cj0414>.

79 **Maintenance.** Our dataset is hosted on the Stanford Research Data digital repository which will  
80 provide long-term support for hosting the dataset. It also provides structured metadata (schema.org  
81 standards) It has the following DOI: <https://doi.org/10.25740/gj714cj0414>.

82 **Author statement.** The authors bear all responsibility in case of violation of rights. All dataset  
83 images were collected by the authors and we are releasing the dataset under CC-BY-4.0.

84 **Format.** The data is uploaded in a simple zip format. Upon decompressing the archive, a directory  
85 is provided for each object category. In each directory, the data is further split into “instance\_1” and  
86 “instance\_2” which represent the two object instances for each category. Under these directories,  
87 JPEG images are stored for each lighting condition, with file name descriptors indicating the relative  
88 angle in degrees of rotation under which the object was taken, as well as in-the-wild images, which  
89 are labeled only with an arbitrary index 0 through<sub>2</sub>4.

## 90 C Potential societal impacts

91 Our paper introduces a metric that may find a range of downstream applications, including improving  
92 the temporal consistency of generative models, augmenting vehicle and human re-identification,  
93 to aiding perception for embodied agents. As with any improvements, e.g., in consistent video  
94 generation, nefarious actors may seek to use these technologies for harmful purposes. We recognize  
95 that there may be additional future applications that we cannot currently foresee.

96 We see opportunities for this research and our findings in Section 5.1 to provide some inspiration for  
97 additional research in neuroscience on understanding the human medial temporal lobe.

98 By introducing a new evaluation dataset, we are also providing a benchmark that may impact the  
99 direction of future work. For example, our dataset consists of common objects largely found around  
100 North American homes and laboratories, and images are captured in outdoor settings in a limited set  
101 of geographical locations. While we select items that we believe are commonly occurring around the  
102 world, performing future evaluation on just the CUTE dataset may create a bias towards particular  
103 types of objects or scenes. Our metric also largely inherits any biases present in the original DINOv2  
104 model.

## 105 D Computational resources

106 The computational resources used were a personal workstation and computing nodes from the  
107 Stanford SC computational cluster. We used a personal workstation with an NVIDIA RTX 3090  
108 GPU for the main experiments, and on the SC cluster, we used around 30 jobs lasting at most 2 hours  
109 each to perform the Re-ID experiments, including the sweeps on the values of  $\alpha$ . We use 1 NVIDIA  
110 TITAN RTX GPU for each job. We also ran additional backbone ablations on the SC cluster with  
111 around 30 jobs lasting at most 4 hours each using one NVIDIA A40 GPU each.

## 112 E Qualitative Analysis

113 One characteristic of the proposed metric is its continuous nature. Different from recognition tasks  
114 such as Re-ID, it does not simply classify two objects as being the same instance but rather measures  
115 how similar they are. Since a measure of distance in the space of all objects is highly subjective and  
116 a definitive ground truth is exceedingly difficult to establish, we evaluate our metric using human  
117 preference.

118 Our study design is as follows: one of the authors generated 10 sets of 5 images each, consisting  
119 of photos taken by the author and photos from the internet. Then 2 other authors each ranked the  
120 image sets, considering both personal preference and the demonstration quality of the set. Their  
121 votes were averaged out and the top 5 image sets were selected. These image sets were then scored  
122 by LPIPS, CLIPScore, and foreground feature averaging (FFA) and ordered from most similar to  
123 least similar to a query object in each set. 34 participants then chose which ordering they prefer  
124 according to their personal subjective opinion. The specific prompt they were given was: "[This is  
125 a quick, anonymous survey about ordering preference. Please carefully look at each set of images.  
126 3 Orderings are presented for each set. Select the ordering that makes the most sense to you. The  
127 images are ordered from most similar to least similar to the first image \(left to right\). There is no one  
128 correct answer, we seek your subjective opinion.](#)"

129 In Figure A2 we see that FFA was the top choice on 4 out of the 5 sets and a close second choice on  
130 the fifth. While the participants showed strong agreement on certain sets, they generally displayed  
131 pretty mixed opinions, highlighting the subjective nature of this type of classification. The given  
132 prompt was intentionally vague, allowing the participants to focus on various aspects of the images  
133 such as the pose of the objects, the background, the class, etc. Despite this, the results of this limited  
134 study suggest that our proposed metric is reasonably aligned with the intuitive human definition of  
135 similarity.

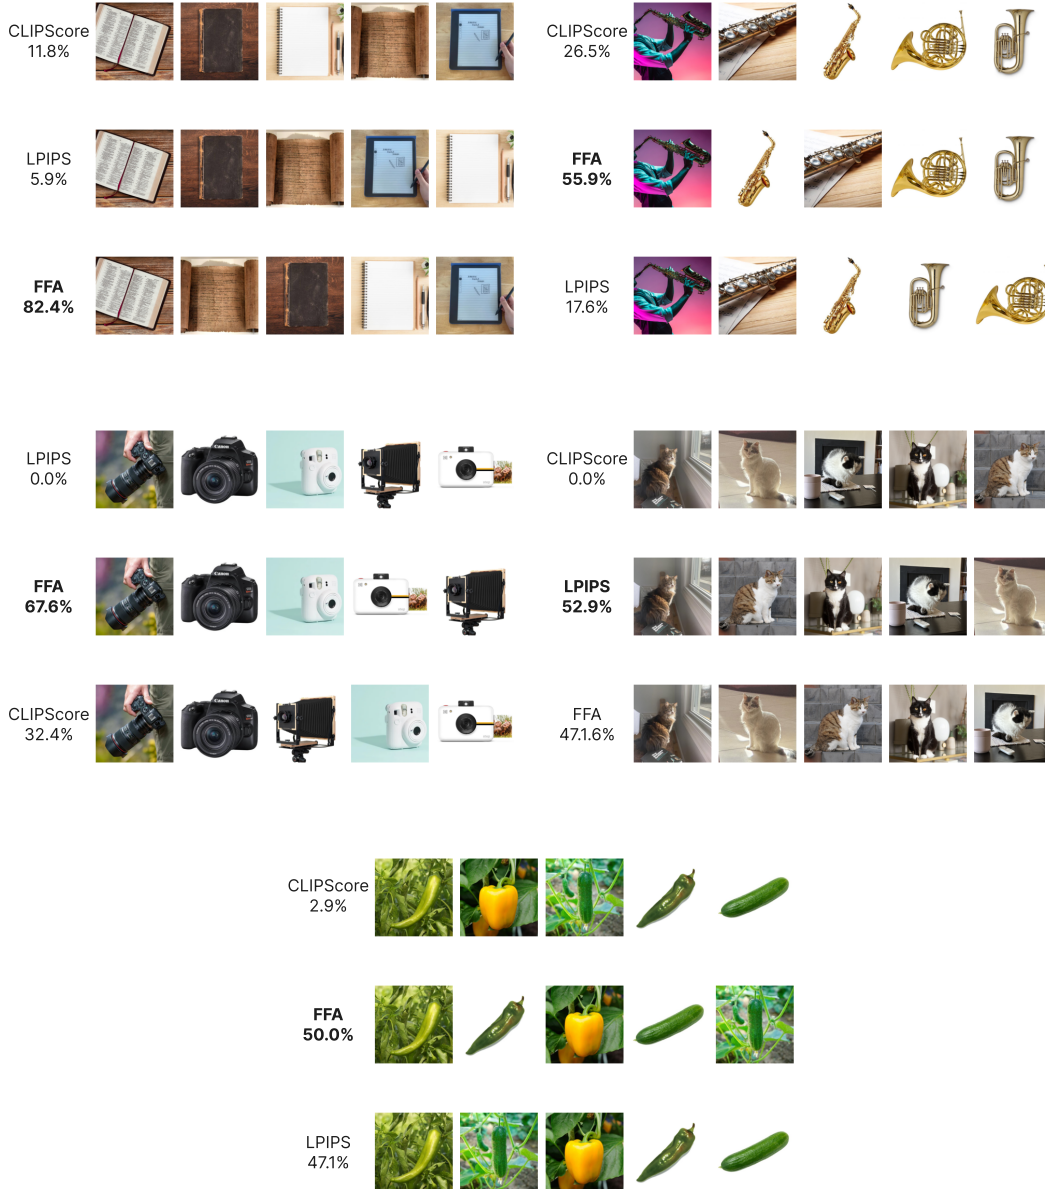

Figure A2: Human survey results. Each of the five groups of images represents an image set. For each image set, we generated three orderings, based on LPIPS, CLIPScore, and foreground feature averaging (FFA) respectively. For each image set, participants were asked to determine which of the three orderings they preferred, where the ordering represented a ranking of the similarity of the first image to the others. We see that in four out of five cases, participants preferred orderings scored as in FFA.

## 136 F Code and instructions for experiments

137 The code can be found at: <https://github.com/s-tian/PlatonicDistance>.

138 **Experimental details and hyperparameters** To strike a balance between performance and speed  
139 we chose the DINOv2 ViT-B/14 distilled backbone (dinov2\_vitb14) for FFA, consisting of 86M  
140 parameters. DINOv2 models are capable of accepting inputs at various resolutions, but we select a  
141 fixed input size of  $336 \times 336$  for the same reason as above, and also to provide a fair comparison to  
142 the CLIPScore metric. Our CLIPScore is based on the ViT-L/14@336px model from OpenAI.

143 In order to obtain the foreground mask we pass the input image through the Tracer-B7 model provided  
144 by CarveKit. We then downsample the foreground mask by a factor of 14 (the DINOv2 patch size) in  
145 order to obtain a mask of the same size as the DINOv2 feature grid. We then superimpose the two  
146 and average the unmasked patches.

## 147 G Re-ID Experimental Details

148 We select the hyperparameter  $\alpha$  for the weighted sum between SpCL and each considered model by  
149 sweeping over the values  $[0.1, 0.2, \dots, 0.9]$  on a validation set and picking the  $\alpha$  value with the best  
150 top-1 accuracy on the validation set. The score is always computed by summing  $\alpha$  times the model  
151 in question and  $1 - \alpha$  times the SpCL score. The selected values of  $\alpha$  for each model are reported  
152 below:

| Model                      | VeRi | CityScapes |
|----------------------------|------|------------|
| SpCL+LPIPS                 | 0.1  | 0.1        |
| SpCL+DINOv2+Crop           | 0.5  | 0.9        |
| SpCL+DINOv2 (Global)       | 0.1  | 0.2        |
| SpCL+FFA DINOv1 (Crop-Img) | 0.7  | 0.9        |
| SpCL+FFA (Crop-Img)        | 0.6  | 0.9        |

Table 2: Selected  $\alpha$  values for ReID experiments combining SpCL with various metrics.

## 153 H Relation to Other Metrics of Similarity

154 There are many aspects to object similarity. One can measure the visual similarity - such as the shape,  
155 color or texture of objects or functional similarity such as the purpose or affordance of an object.  
156 Often these measures are entirely orthogonal to each other, and further influenced by the context of  
157 the comparison. Because of this, many measurements of object similarity lack proper ground truth.  
158 Our aim is to define one particular dimension of similarity where we can obtain at least partial ground  
159 truth labels. We can obtain strong binary labels for this particular metric based on the identity of the  
160 objects themselves – different images of the same object should have an ideal perfect similarity.
